# Supplementary material for: Which Green Space Metric Best Predicts a Lowered Odds of Type 2 Diabetes?
Source: MDPI journal article supplement (doi:10.3390/ijerph18084088), 2021-04-13
Supplement: s1 [file s1]

**Table S1.** Characteristics of green space by green space metrics,  $n = 94,075$ .

| <b>Green Space %</b>            | <b>Type of Buffer, n (%)</b> |               |                |
|---------------------------------|------------------------------|---------------|----------------|
| <b>Within 500m buffer</b>       | <b>Circular</b>              | <b>PBRN</b>   | <b>LBRN</b>    |
| (0–10%]                         | 59,549 (63.3)                | 85,537 (90.9) | 82,489 (87.7)  |
| (10–20%]                        | 20,885 (22.2)                | 7033 (7.5)    | 9561 (10.2)    |
| (20–30%]                        | 7902 (8.4)                   | 1068 (1.1)    | 1411 (1.5)     |
| (30–40%]                        | 3669 (3.9)                   | 241 (0.3)     | 368 (0.4)      |
| >40%                            | 2070 (2.2)                   | 196 (0.2)     | 246 (0.3)      |
| <b>Within 1km buffer</b>        |                              |               |                |
| (0–10%]                         | 51,025 (54.2)                | 82,977 (88.2) | 82,415 (87.6)  |
| (10–20%]                        | 27,262 (29.0)                | 9803 (10.4)   | 10,2561 (10.9) |
| (20–30%]                        | 9762 (10.4)                  | 846 (0.9)     | 891 (0.9)      |
| (30–40%]                        | 3458 (3.7)                   | 288 (0.3)     | 304 (0.3)      |
| >40%                            | 2568 (2.7)                   | 161 (0.2)     | 209 (0.2)      |
| <b>Within 2km buffer</b>        |                              |               |                |
| (0–10%]                         | 41,307 (43.9)                | 78,368 (83.3) | 81,833 (87.0)  |
| (10–20%]                        | 37,907 (40.3)                | 13,859 (14.7) | 10,739 (11.4)  |
| (20–30%]                        | 9090 (9.7)                   | 1285 (1.4)    | 954 (1.0)      |
| (30–40%]                        | 3141 (3.3)                   | 324 (0.3)     | 311 (0.3)      |
| >40%                            | 2630 (2.8)                   | 239 (0.3)     | 238 (0.3)      |
| <b>Average green space area</b> | <b>Type of buffer, n (%)</b> |               |                |
| <b>Within 500m</b>              | <b>Circular</b>              | <b>PBRN</b>   | <b>LBRN</b>    |
| ≤0.5km <sup>2</sup>             | 87,070 (92.6)                | 88,901 (94.5) | 88,842 (94.4)  |
| (0.5–1] km <sup>2</sup>         | 2628 (2.8)                   | 2188 (2.3)    | 2248 (2.4)     |
| (1–3] km <sup>2</sup>           | 1959 (2.1)                   | 1425 (1.5)    | 1404 (1.5)     |
| (3–5] km <sup>2</sup>           | 551 (0.6)                    | 413 (0.4)     | 415 (0.4)      |
| (5–10] km <sup>2</sup>          | 631 (0.7)                    | 344 (0.4)     | 326 (0.3)      |
| (10–20] km <sup>2</sup>         | 563 (0.6)                    | 454 (0.5)     | 489 (0.5)      |
| (20–30] km <sup>2</sup>         | 244 (0.3)                    | 98 (0.1)      | 111 (0.1)      |
| (30–40] km <sup>2</sup>         | 289 (0.3)                    | 172 (0.2)     | 161 (0.2)      |
| (40–50] km <sup>2</sup>         | 140 (0.1)                    | 80 (0.1)      | 79 (0.1)       |
| <b>Within 1km</b>               |                              |               |                |
| ≤0.5km <sup>2</sup>             | 86,156 (91.6)                | 87,913 (93.4) | 87,965 (93.5)  |
| (0.5–1] km <sup>2</sup>         | 2520 (2.7)                   | 2317 (2.5)    | 2254 (2.4)     |
| (1–3] km <sup>2</sup>           | 1959 (2.1)                   | 1710 (1.8)    | 1702 (1.8)     |
| (3–5] km <sup>2</sup>           | 1089 (1.2)                   | 480 (0.5)     | 488 (0.5)      |
| (5–10] km <sup>2</sup>          | 976 (1)                      | 602 (0.6)     | 510 (0.5)      |
| (10–20] km <sup>2</sup>         | 650 (0.7)                    | 490 (0.5)     | 607 (0.6)      |
| (20–30] km <sup>2</sup>         | 403 (0.4)                    | 293 (0.3)     | 301 (0.3)      |
| (30–40] km <sup>2</sup>         | 235 (0.2)                    | 190 (0.2)     | 166 (0.2)      |
| (40–50] km <sup>2</sup>         | 87 (0.1)                     | 80 (0.1)      | 82 (0.1)       |
| <b>Within 2km</b>               |                              |               |                |
| ≤0.5km <sup>2</sup>             | 84,290 (89.6)                | 87,133 (92.6) | 87,134 (92.6)  |
| (0.5–1] km <sup>2</sup>         | 2070 (2.2)                   | 1943 (2.1)    | 1788 (1.9)     |
| (1–3] km <sup>2</sup>           | 3619 (3.8)                   | 2042 (2.2)    | 2165 (2.3)     |
| (3–5] km <sup>2</sup>           | 1471 (1.6)                   | 824 (0.9)     | 919 (1)        |
| (5–10] km <sup>2</sup>          | 1420 (1.5)                   | 806 (0.9)     | 704 (0.7)      |
| (10–20] km <sup>2</sup>         | 806 (0.9)                    | 802 (0.9)     | 895 (1.0)      |
| (20–30] km <sup>2</sup>         | 148 (0.2)                    | 244 (0.3)     | 173 (0.2)      |
| (30–40] km <sup>2</sup>         | 159 (0.2)                    | 195 (0.2)     | 178 (0.2)      |
| (40–50] km <sup>2</sup>         | 92 (0.1)                     | 86 (0.1)      | 119 (0.1)      |
